# Supplementary material for: A Method to Combine Signals from Spontaneous Reporting Systems and Observational Healthcare Data to Detect Adverse Drug Reactions
Source: Springer Nature journal article supplement (doi:10.1007/s40264-015-0314-8), 2015-07-07

Journal: Drug Safety

Title: A method to combine signals from spontaneous reporting systems and observational healthcare data to detect adverse drug reactions

Authors:

Ying Li<sup>1</sup>, Patrick B Ryan<sup>1,2,3</sup>, Ying Wei<sup>4\*</sup> and Carol Friedman<sup>1\*</sup>

1. Department of Biomedical Informatics, Columbia University, New York, New York, 10032
2. Janssen Research and Development, 1125 Trenton Harbourton Rd, Titusville NJ 08560
3. Observational Health Data Sciences and Informatics (OHDSI), New York, NY 10032
4. Department of Biostatistics, Columbia University, New York, New York, 10032

\* The last two authors contributed equally

#### **Compliance with ethical standards**

Author 1 Ying Li has no conflicts of interest that are directly relevant to the content of this study.

Author 2 Patrick B Ryan is an employee of Janssen Research and Development, and a shareholder of Johnson & Johnson

Author 3 Ying Wei has no conflicts of interest that are directly relevant to the content of this study.

Author 4 Carol Friedman is a consultant for Health Fidelity.

#### **Correspondence**

##### **Mailing address:**

Ying Li  
Department of Biomedical Informatics  
Columbia University Medical Center  
622 W. 168th Street, Presbyterian Building 20<sup>th</sup> Floor  
New York, NY 10032

##### **Email:**

[yl2565@columbia.edu](mailto:yl2565@columbia.edu)

##### **Telephone:**

347-277-5572

##### **Fax:**

212-305-3302

## Electronic Supplementary Material

### Box 1 Formulas for two-step LASSO regression

In the first step, standard LASSO is applied to select a set of potential confounders associated with the ADR, denoted by  $S_1$ ; In the second step, LASSO type regression is used again to select medical conditions that are highly associated with the drug use, and denote them as  $S_2$ . In both steps, we used 5-fold cross-validation to select LASSO penalties. Finally, we estimate the conditional association between the ADR and drug adjusting for all the confounders in  $(S_1 \cup S_2)$ . We then use one-sided p-values of the adjusted log odds ratios (log ORs) in the last step as the signal scores.

$$\text{logit}(\text{prob}(\text{ADR} = 1)) = \alpha^{(1)} + \beta^{(1)}\text{Rx} + \sum_{i \in M} \gamma_i^{(1)} C_i \quad (1)$$

$$E[\omega \text{Rx}] = \alpha^{(2)} + \sum_{i \in M} \omega \gamma_i^{(2)} C_i \quad \text{where}$$

$$w = \sqrt{\text{prob}(\text{ADR} = 1 | \text{Rx}, C_i) * (1 - \text{prob}(\text{ADR} = 1 | \text{Rx}, C_i))} \quad \text{and } i \in S_1 \quad (2)$$

$$\text{logit}(\text{prob}(\text{ADR} = 1)) = \alpha^{(3)} + \beta^{(2)}\text{Rx} + \sum_{i \in S_1 \cup S_2} \gamma_i^{(3)} C_i \quad (3)$$

**Table S1. False positive signals in the EHR**

| Medication    | ADR      | a   | b     | c     | d       | Pvalue1 | Pvalue2 |
|---------------|----------|-----|-------|-------|---------|---------|---------|
| hyoscyamine   | GI Bleed | 24  | 976   | 27614 | 2094848 | 0.00    | 0.00    |
| rosiglitazone | GI Bleed | 213 | 30123 | 27425 | 2065701 | 0.00    | 0.01    |
| hyoscyamine   | ALI      | 19  | 981   | 39029 | 2083433 | 0.00    | 0.01    |
| metaxalone    | AMI      | 81  | 2214  | 18371 | 2102796 | 0.09    | 0.04    |

a: number of patients were exposed to the medication and developed the ADR

b: number of patients were exposed to the medication and not developed the ADR

c: number of patients were not exposed to the medication and developed the ADR

d: number of patients were not exposed to the medication and not developed the ADR

pvalue1: unadjusted one-sided p-value

pvalue2: adjusted one-sided p-value

**Table S2. False negative signals in the NYP/CUMC EHR**

| Medication         | ADR      | a    | b     | c     | d      | Pvalue1 | Pvalue2 |
|--------------------|----------|------|-------|-------|--------|---------|---------|
| amlodipine         | AMI      | 963  | 17010 | 4854  | 191352 | 0.00    | 1.00    |
| darbepoetin alfa   | AMI      | 134  | 2160  | 5683  | 206202 | 0.00    | 1.00    |
| dipyridamole       | AMI      | 102  | 1510  | 5715  | 206852 | 0.00    | 0.99    |
| nifedipine         | AMI      | 209  | 3490  | 5608  | 204872 | 0.00    | 0.17    |
| Acyclovir          | ARF      | 266  | 2631  | 14624 | 197082 | 0.00    | 1.00    |
| allopurinol        | ARF      | 725  | 2079  | 14165 | 197634 | 0.00    | 0.19    |
| Captopril          | ARF      | 400  | 1739  | 14490 | 197974 | 0.00    | 1.00    |
| cyclosporine       | ARF      | 352  | 907   | 14538 | 198806 | 0.00    | 1.00    |
| enalaprilat        | ARF      | 228  | 1191  | 14662 | 198522 | 0.00    | 0.85    |
| Ibuprofen          | ARF      | 756  | 32402 | 14134 | 167311 | 1.00    | 1.00    |
| Ketorolac          | ARF      | 164  | 5386  | 14726 | 194327 | 1.00    | 1.00    |
| Lisinopril         | ARF      | 2815 | 16984 | 12075 | 182729 | 0.00    | 0.98    |
| meloxicam          | ARF      | 103  | 1977  | 14787 | 197736 | 1.00    | 0.90    |
| Naproxen           | ARF      | 256  | 6767  | 14634 | 192946 | 1.00    | 1.00    |
| allopurinol        | ALI      | 164  | 2926  | 5935  | 203323 | 0.00    | 1.00    |
| ciprofloxacin      | ALI      | 222  | 4892  | 5877  | 201357 | 0.00    | 1.00    |
| cyclosporine       | ALI      | 178  | 1117  | 5921  | 205132 | 0.00    | 0.94    |
| Diltiazem          | ALI      | 224  | 5814  | 5875  | 200435 | 0.00    | 1.00    |
| fluconazole        | ALI      | 330  | 4845  | 5769  | 201404 | 0.00    | 1.00    |
| Ibuprofen          | ALI      | 545  | 30766 | 5554  | 175483 | 1.00    | 1.00    |
| Ketorolac          | ALI      | 125  | 5120  | 5974  | 201129 | 0.98    | 1.00    |
| lamivudine         | ALI      | 126  | 1204  | 5973  | 205045 | 0.00    | 1.00    |
| levofloxacin       | ALI      | 591  | 11486 | 5508  | 194763 | 0.00    | 1.00    |
| Lisinopril         | ALI      | 738  | 19117 | 5361  | 187132 | 0.00    | 1.00    |
| Naproxen           | ALI      | 134  | 5921  | 5965  | 200328 | 1.00    | 1.00    |
| nifedipine         | ALI      | 150  | 3742  | 5949  | 202507 | 0.00    | 0.98    |
| Ramipril           | ALI      | 139  | 3562  | 5960  | 202687 | 0.00    | 0.99    |
| citalopram         | GI BLEED | 246  | 4250  | 6437  | 202220 | 0.00    | 1.00    |
| clopidogrel        | GI BLEED | 542  | 12940 | 6141  | 193530 | 0.00    | 1.00    |
| escitalopram       | GI BLEED | 188  | 3616  | 6495  | 202854 | 0.00    | 0.72    |
| Ibuprofen          | GI BLEED | 492  | 27177 | 6191  | 179293 | 1.00    | 1.00    |
| Ketorolac          | GI BLEED | 105  | 4813  | 6578  | 201657 | 1.00    | 1.00    |
| Naproxen           | GI BLEED | 168  | 5052  | 6515  | 201418 | 0.36    | 1.00    |
| potassium chloride | GI BLEED | 154  | 2778  | 6529  | 203692 | 0.00    | 1.00    |

|            |          |     |      |      |        |      |      |
|------------|----------|-----|------|------|--------|------|------|
| Sertraline | GI BLEED | 256 | 4850 | 6427 | 201620 | 0.00 | 0.85 |
|------------|----------|-----|------|------|--------|------|------|

a: number of patients were exposed to the medication and developed the ADR

b: number of patients were exposed to the medication and not developed the ADR

c: number of patients were not exposed to the medication and developed the ADR

d: number of patients were not exposed to the medication and not developed the ADR

pvalue1: unadjusted one-sided p-value

pvalue2: adjusted one-sided p-value

**Table S3 Reference set and the AUC performance for the confounding adjustment method and Gamma Poisson Shrinkage (GPS) method on the basis of FAERS from 2004 to 2010**

|                             | Reference set |          | AUC performance               |            |
|-----------------------------|---------------|----------|-------------------------------|------------|
|                             | Positive      | Negative | Confounding adjustment method | GPS (EB05) |
| Acute renal failure         | 23            | 52       | 0.90                          | 0.76       |
| Acute liver injury          | 77            | 33       | 0.72                          | 0.87       |
| Acute myocardial infarction | 34            | 59       | 0.72                          | 0.70       |
| Upper GI bleeding           | 24            | 63       | 0.81                          | 0.79       |

**Figure S1 Comparison between single LASSO and double LASSO on the basis of the EHR for acute renal failure**

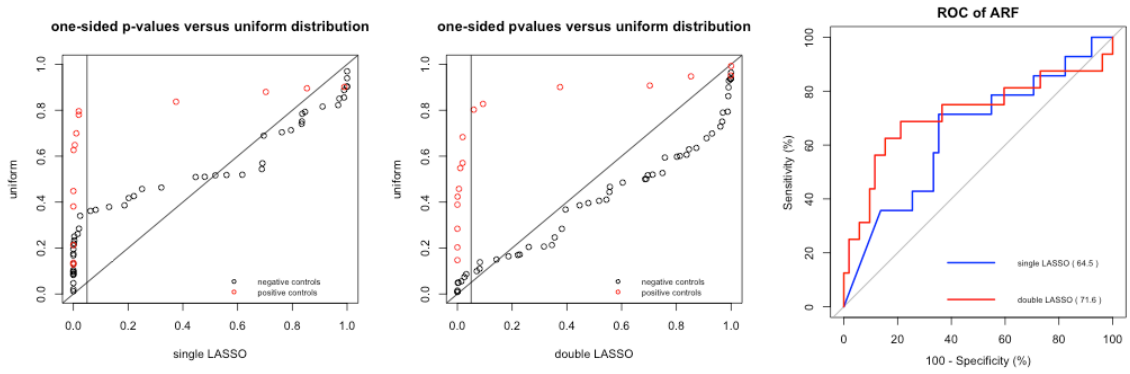

**Figure S2 Comparison between single LASSO and double LASSO on the basis of the FAERS for acute renal failure**

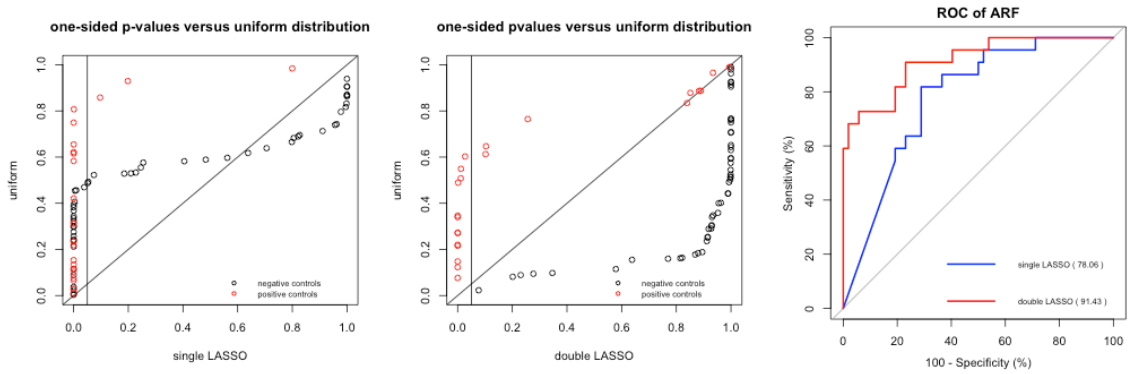

Supplement: MOESM1 [file 24117362]
